# Supplementary material for: Dynamic Association of ESCRT-II Proteins with ESCRT-I and ESCRT-III Complexes during Phagocytosis of Entamoeba histolytica
Source: MDPI journal article supplement (doi:10.3390/ijms24065267), 2023-03-09

**Figure S1.** Comparison of Vps22 amino acid sequences between *Homo sapiens*, *Saccharomyces cerevisiae* and *Entamoeba histolytica*.

|                                 |                                                               |
|---------------------------------|---------------------------------------------------------------|
| <i>Entamoeba histolytica</i>    | MSKRTIDLLCRQKEAMS-----TKGKEFCLVNQKERERQINLFKLKLEEFQNNRYEITN   |
| <i>Homo sapiens</i>             | MHRRGVGAGAIAKKKLAEAKYKERGTVLAEDQLAQMSKQLDMFKNLEEFASKHKQEIRK   |
| <i>Saccharomyces cerevisiae</i> | MKQFGLAAF-----DELKDGKYNDVNKTILEKQSVELRDQLMVFQERLVEFAKKHNSQLQA |
|                                 | * . : . : .. : : : *: **: .* ** .:. *:                        |
| <i>Entamoeba histolytica</i>    | DVNIQNMLYILCRKMGVEPLTTEKSYFN---IFFGSNAFYNELTVQIIEECYKSRESNGG  |
| <i>Homo sapiens</i>             | NPEFRVQFQDMCATIGVDPLASGKGFWS---EMLGVGDFYYELGVQIIEVCLALKHRNGG  |
| <i>Saccharomyces cerevisiae</i> | SPEFRSKFMHMCSSIGIDPL----SLFDRDKHLFTVNDFYEVCLKVIEICRQTKDMNGG   |
|                                 | . :. : : * .:***. . :. :. ** *: :.*** * . ***                 |
| <i>Entamoeba histolytica</i>    | IIEINKLCELINKKR---KSIIRQNDIFKAINQAKCLGEGCLKVVTIYQQSYVISVPFELA |
| <i>Homo sapiens</i>             | LITLEELHQQVLKGRGKFAQDVSQDDLIRAIKKLKALGTGFGIIPVGGTYLIQSVPAELN  |
| <i>Saccharomyces cerevisiae</i> | VISFQELEKVHFR-----KLVNGLDDLEKSIDMLKSL-ECFEIFQIRGKKFLRSVPNELT  |
|                                 | :* :*: : . : :*: .:*. *. * : :. : : *** **                    |
| <i>Entamoeba histolytica</i>    | DDQQVVLTLNKKPYFLEDELLI-IGWSKERVKGTLVWLLNIGMLWVDDQFPLDGKTTRA   |
| <i>Homo sapiens</i>             | MDHTVVLQLAEKNGYVTVSEIKASLKWETERARQVLEHLLKEGLAWLDLQAPGEAH----  |
| <i>Saccharomyces cerevisiae</i> | SDQTKILEICSIILGYSSISLLKANLGWEAVRSKSALDEMANGLLWIDYQGGAEAL----  |
|                                 | *: *: : . * . : : *. * . .* :. *: *: * * :.                   |
| <i>Entamoeba histolytica</i>    | YWTSLY--NLF-----                                              |
| <i>Homo sapiens</i>             | YNLPALFTDLYSQEITAEAREALP                                      |
| <i>Saccharomyces cerevisiae</i> | YNDPSWITRQL-----                                              |
|                                 | ** .                                                          |





**Figure S3.** Comparison of Vps36 amino acid sequences between *Homo sapiens*, *Saccharomyces cerevisiae* and *Entamoeba histolytica*.

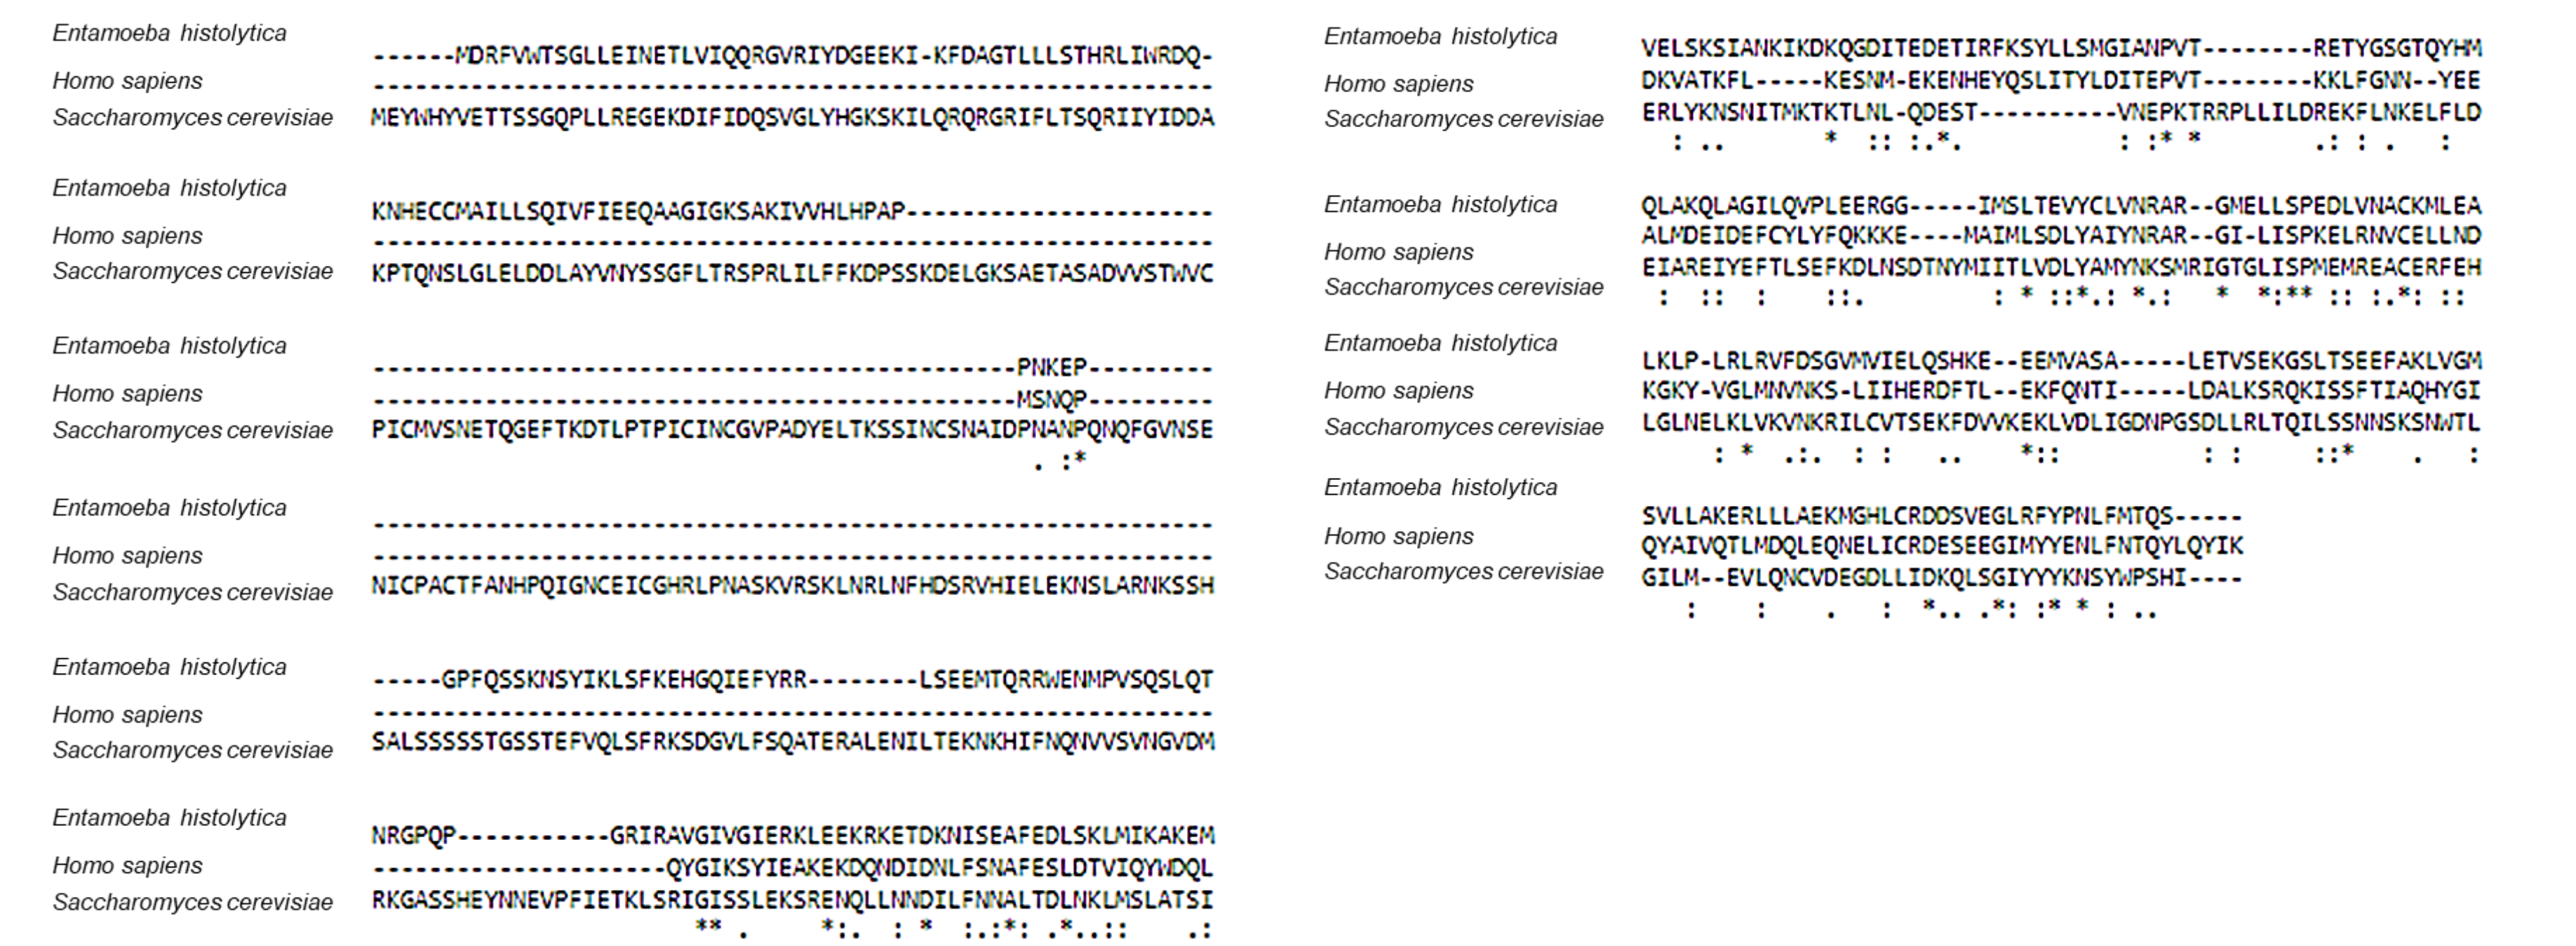

**Figure S4.** EhVps22, EhVps25, and EhVps36 proteins conserve the WH domains.

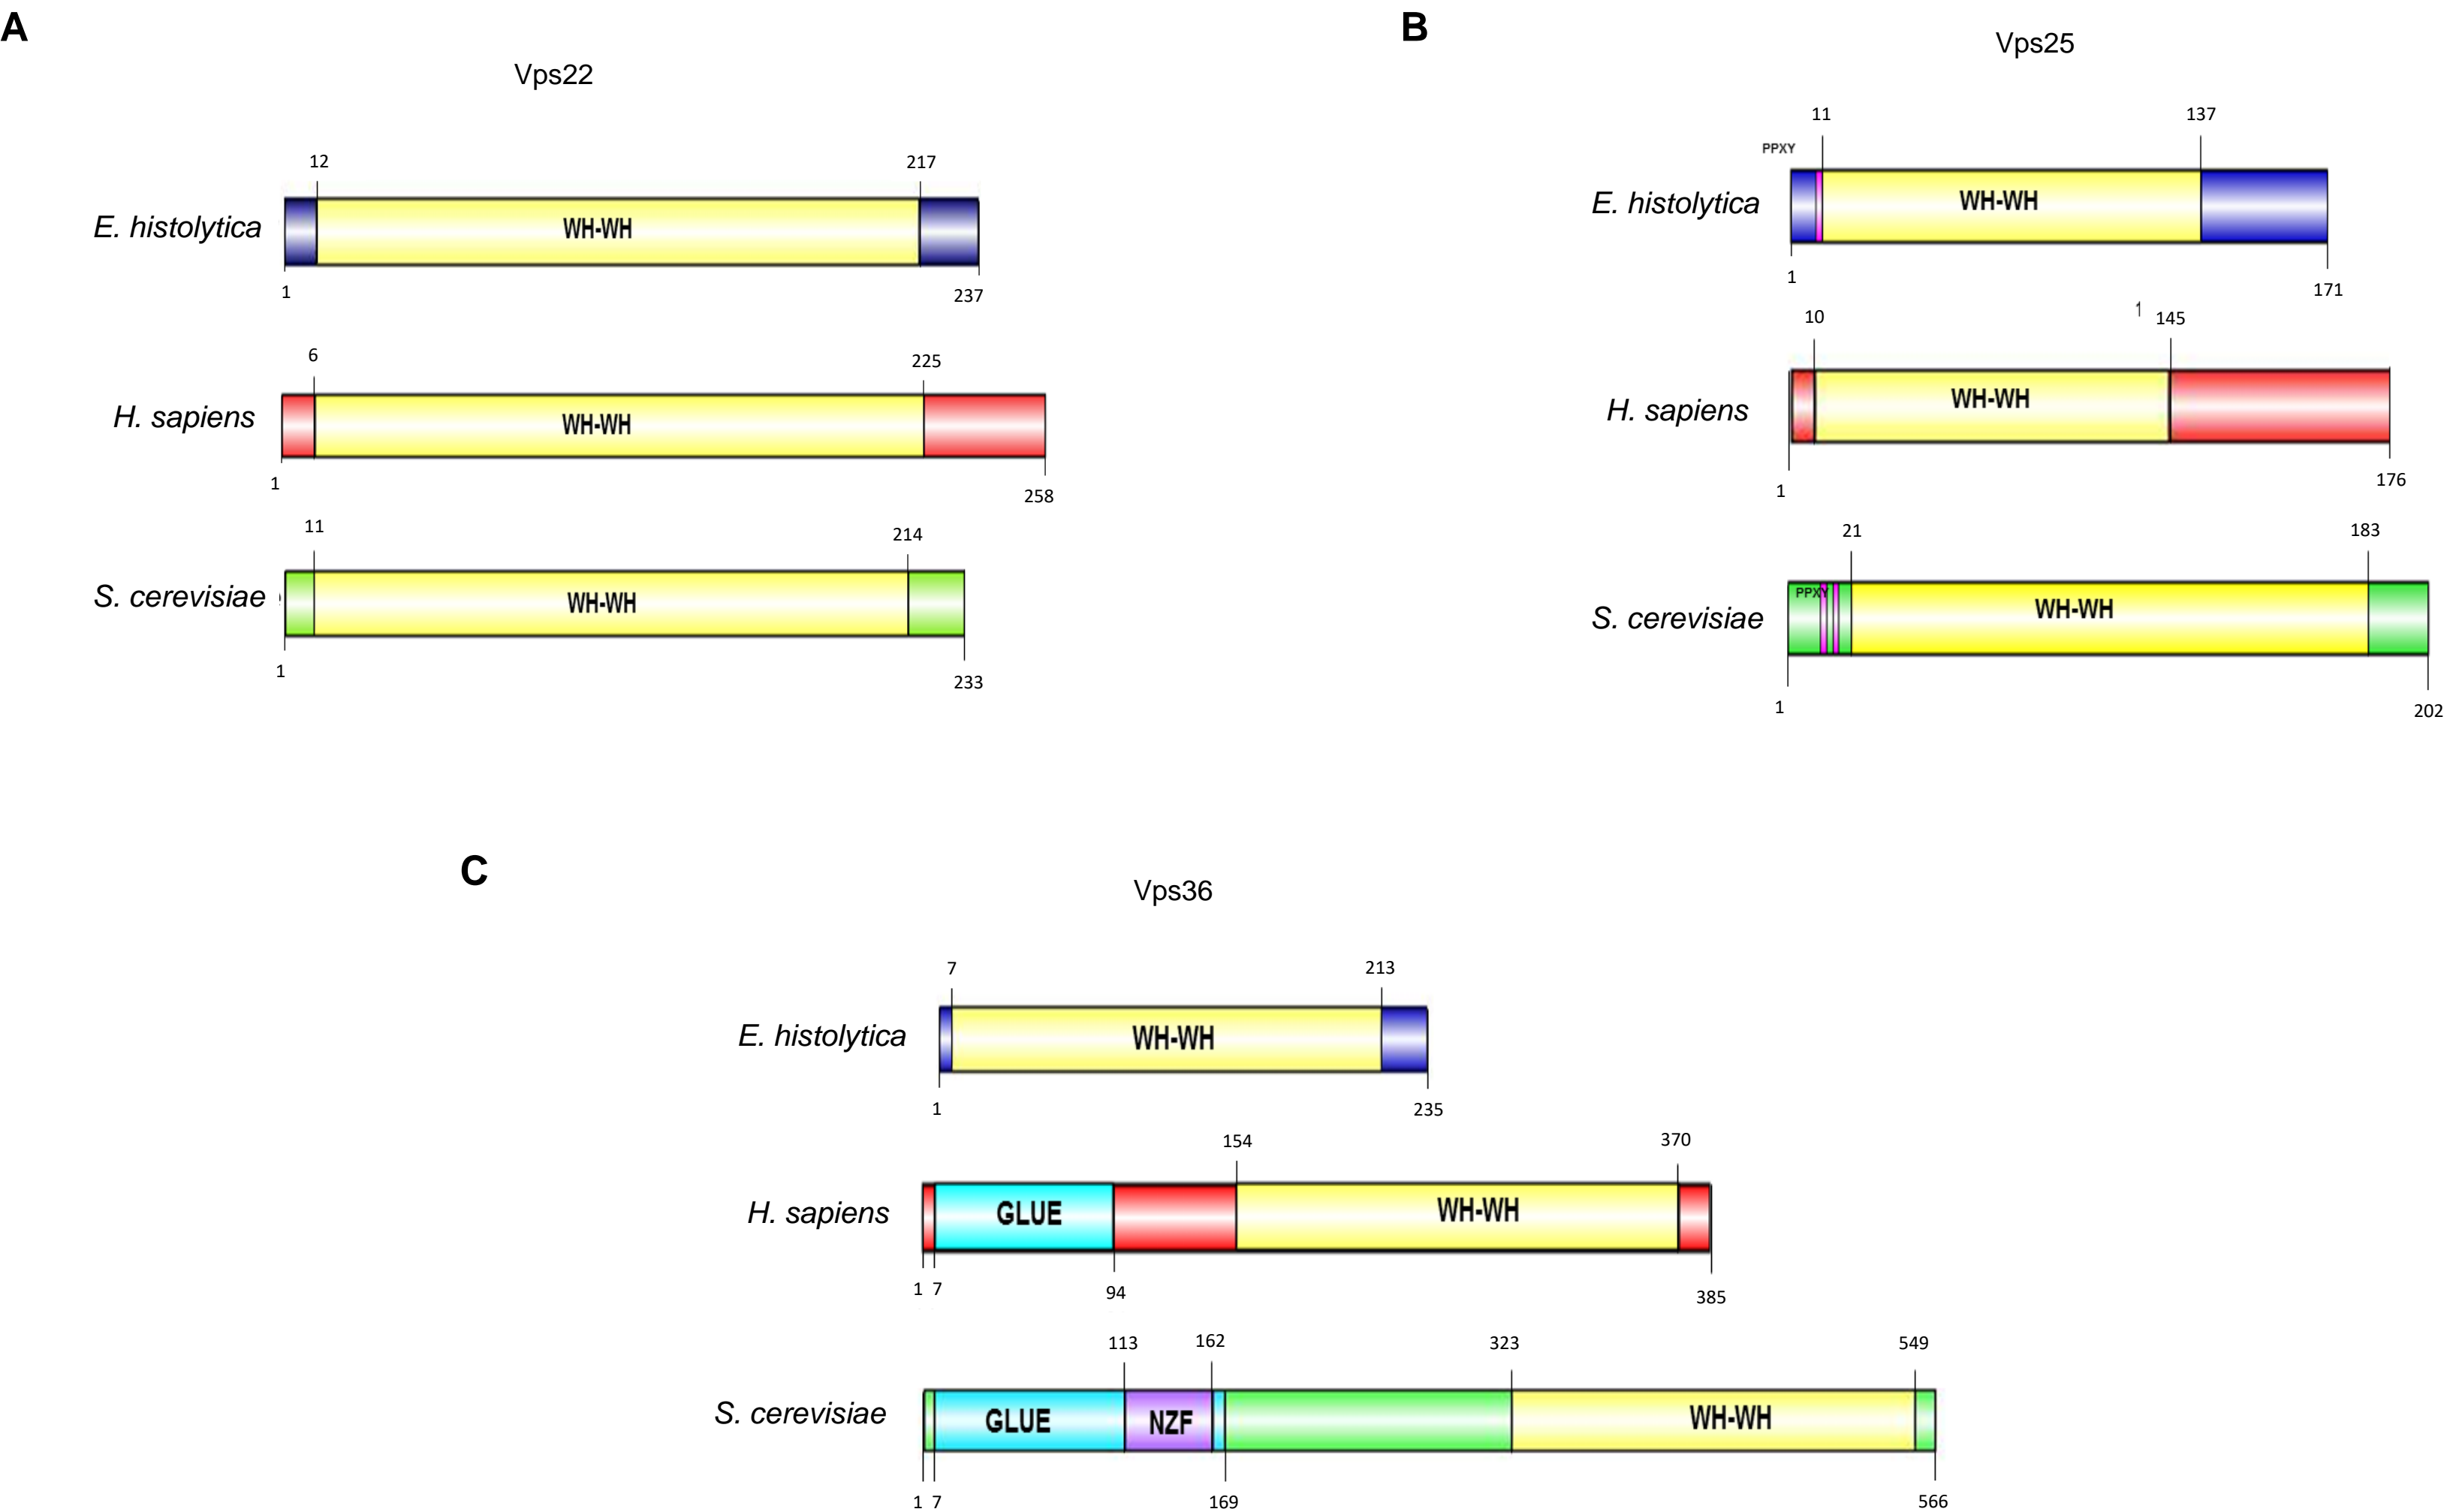



**Figure S5.** Predicted model of EhVps22, EhVps25, and EhVps36 MDS results

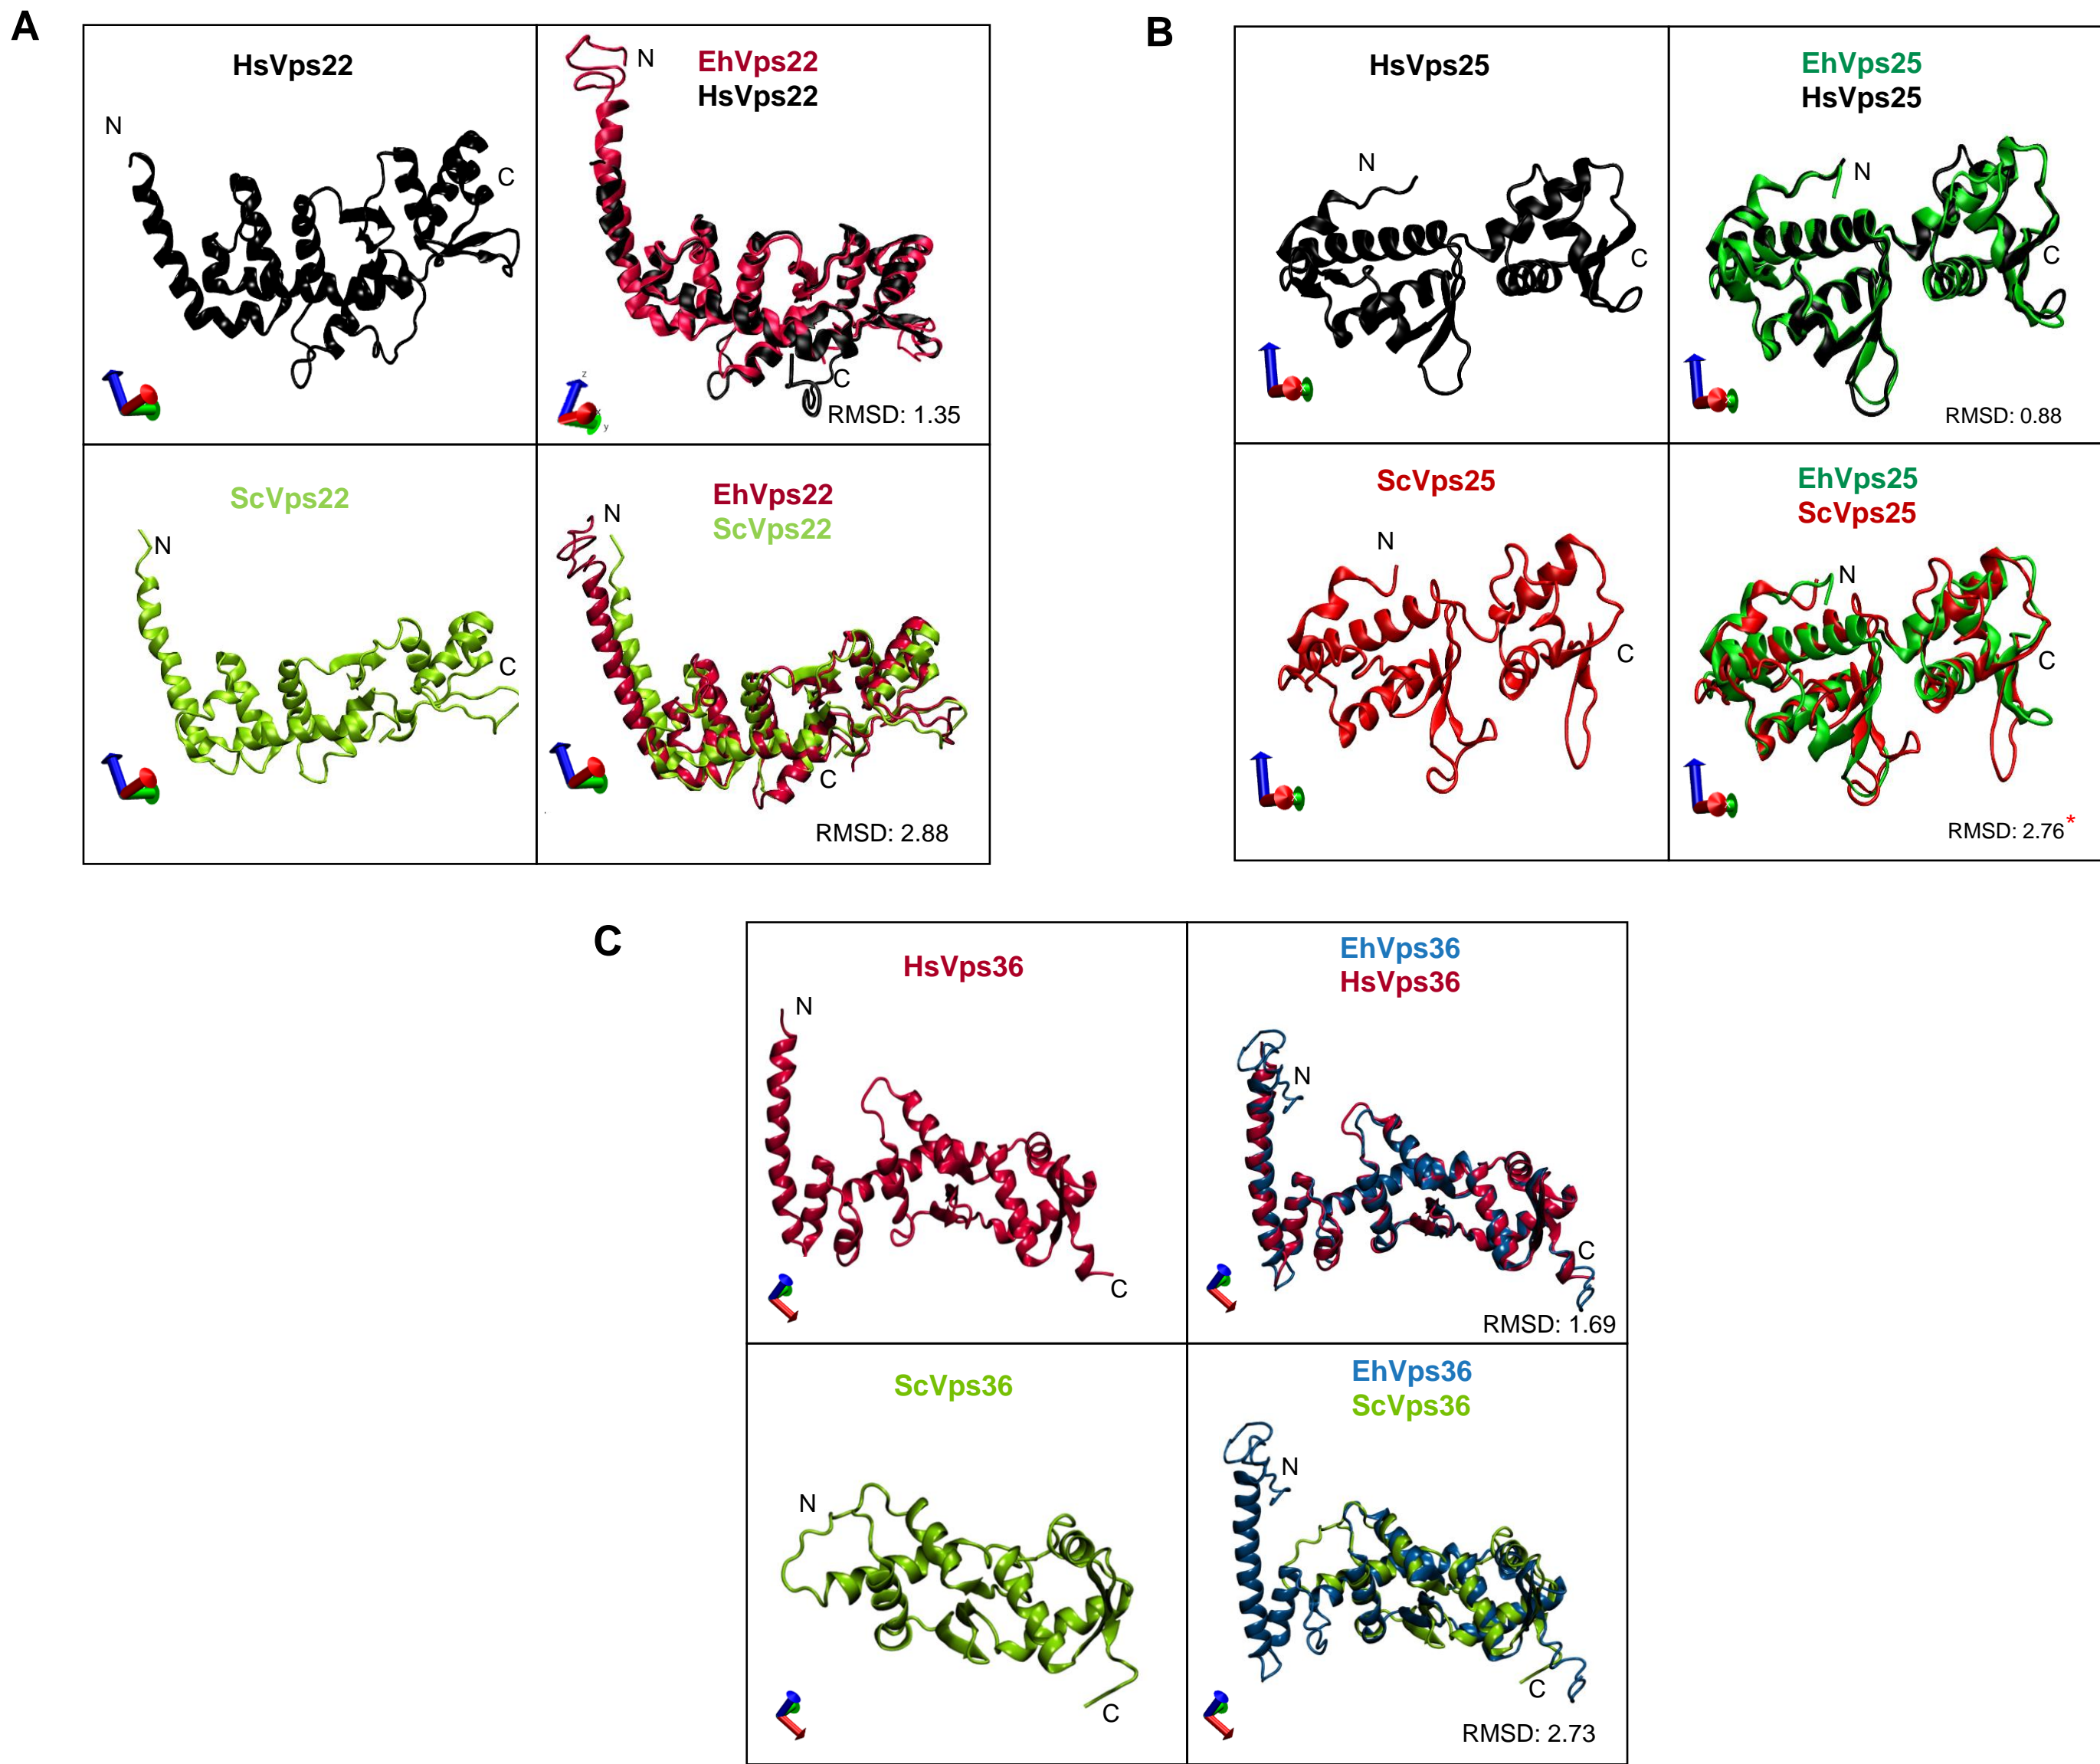

Supplement: s1 [file s1]
